# Supplementary material for: Thermally stable fishnet-like 1T-MoS2/CNT heterostructures with improved electrode performance
Source: Royal Society of Chemistry journal article supplement (doi:10.1039/d0ta10812j), 2020-12-15
Supplement: d0ta10812j1.pdf [file d0ta10812j1.pdf]

## Supporting Information

### **Thermally stable fishnet-like 1T-MoS<sub>2</sub>/CNTs heterostructures with improved electrode performance**

Zhendong Lei, Xue Yu, Yong Zhang\*, Jing Zhan\*

*Z. D. Lei,*

*NUS Graduate School for Integrative Sciences and Engineering, National University of Singapore, Singapore 117456*

*Xue Yu, Dr. J. Zhan\**

*School of Environmental and Chemical Engineering, Shanghai University, 99 Shangda Road, Shanghai, P. R. China, 200444*

*Z. D. Lei, Dr. J. Zhan, Prof. Yong Zhang*

*Department of Biomedical Engineering, Faculty of Engineering, National University of Singapore, Singapore 117583*

*E-mail: “Yong Zhang” [biezy@nus.edu.sg](mailto:biezy@nus.edu.sg); “Jing Zhan” [biezhj@nus.edu.sg](mailto:biezhj@nus.edu.sg)*

### Density Functional Theory Calculations.

The calculations were performed in the framework of DFT with the CASTEP program in Materials Studio by Accelrys Inc.<sup>[1]</sup> The Perdew–Burke–Ernzerhof (PBE) functional within the generalized gradient approximation (GGA) was used to evaluate the nonlocal exchange correlation energy.<sup>[2]</sup> An ultrasoft pseudopotential was used for interactions between electrons and ions.<sup>[3]</sup> A cutoff energy of 421 eV and 3\*3\*1 k-point grid generated with the Monk-horst– Pack scheme were used. The Grimme method were used for DFT-D correction. A vacuum of 10 Å was inserted between neighboring cells along the c-axis to minimize interactions between cells. The atomic structures were optimized using the BFGS algorithm.<sup>[4]</sup> The convergence criteria were set to: (1) an energy tolerance of 1.0e<sup>-5</sup> eV per atom; (2) a force tolerance of 0.03 eV Å<sup>-1</sup>; (3) a max displacement tolerance of 0.001 Å; (4) a self-consistent field tolerance of 1.0e<sup>-5</sup> eV per atom. The transition state (TS) searches were performed at the same theoretical level with the complete linear synchronous transit/quadratic synchronous transit (LST/QST) method.<sup>[5-6]</sup> 3×3 MoS<sub>2</sub> and MoS<sub>2</sub>-Graphene with ether structures were adopted for TS searches calculation and the total energy was divided by 9 to obtain the activation energy per MoS<sub>2</sub> unit cell.

### Calculations method of specific capacity.

The specific capacity of 3D@1T-MoS<sub>2</sub> is calculated by removing the contribution of CNT-CFC matrix. Specifically, we calculate the specific capacity of 3D@1T-MoS<sub>2</sub> by using

$$SC_M = (AC_M - AC_C) / A_M$$

Where  $SC_M$  is the specific capacity of 3D@1T-MoS<sub>2</sub>,  $AC_M$  and  $AC_C$  are the average area capacity of 3D@1T-MoS<sub>2</sub> and CNT-CFC, respectively.  $A_M$  is the mass loading of MoS<sub>2</sub> on 3D@1T-MoS<sub>2</sub>. For example, the mass loading of MoS<sub>2</sub> on 3D@1T-MoS<sub>2</sub> is 1.00 mg cm<sup>-2</sup>, the average area capacity of 3D@1T-MoS<sub>2</sub> is 3.942 mAh cm<sup>-2</sup> at 0.1 mA cm<sup>-2</sup>, and the average area capacity of CNT-CFC is 2.947 mAh cm<sup>-2</sup> at 0.1 mA cm<sup>-2</sup>(Fig. 4c). So, the average specific capacity of 3D@1T-MoS<sub>2</sub> at 0.1 mA cm<sup>-2</sup> for LIBs is calculated as 995 mAh g<sup>-1</sup>. The specific capacity of 3D@1T-MoS<sub>2</sub>-700 is calculated in the same way (1.1 mg cm<sup>-2</sup>).

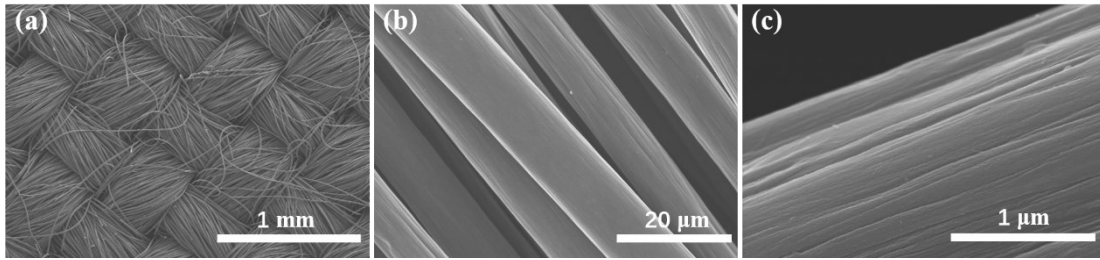

**Fig. S1** SEM images of annealed CFC with different magnification (a), (b) and (c).

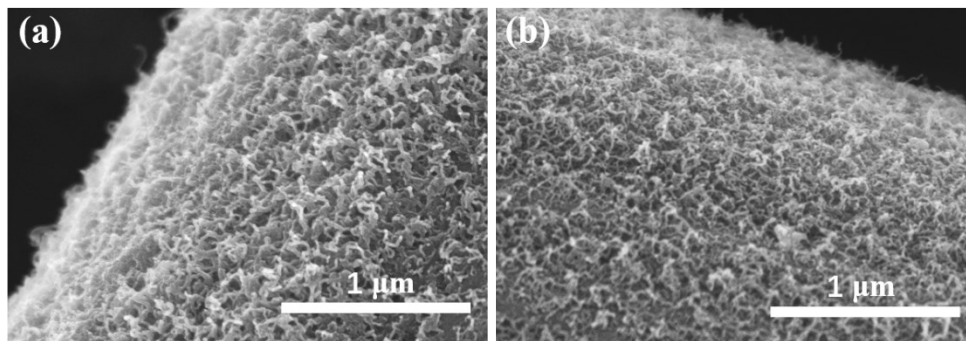

**Fig. S2** SEM images of CNT-CFC (a) before and (b) after calcined at 700 °C in an Ar atmosphere.

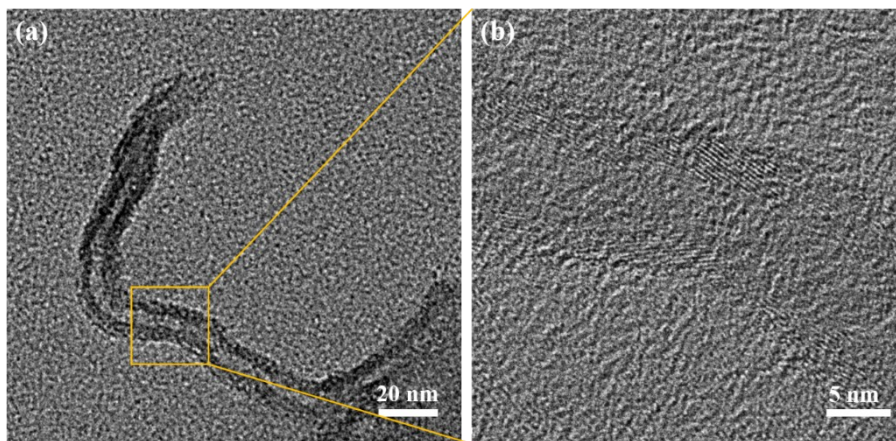

**Fig. S3** TEM and HR-TEM images of CNT-CFC.

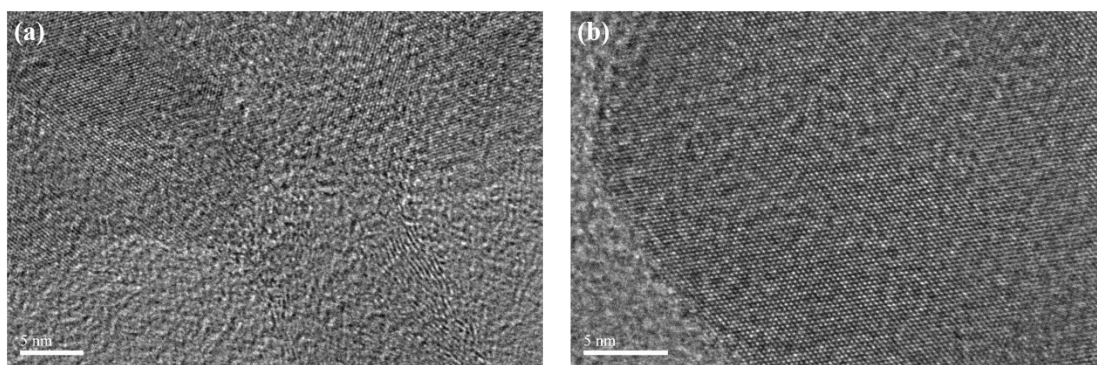

**Fig. S4** HR-TEM images of 3D@1T-MoS<sub>2</sub>-700.

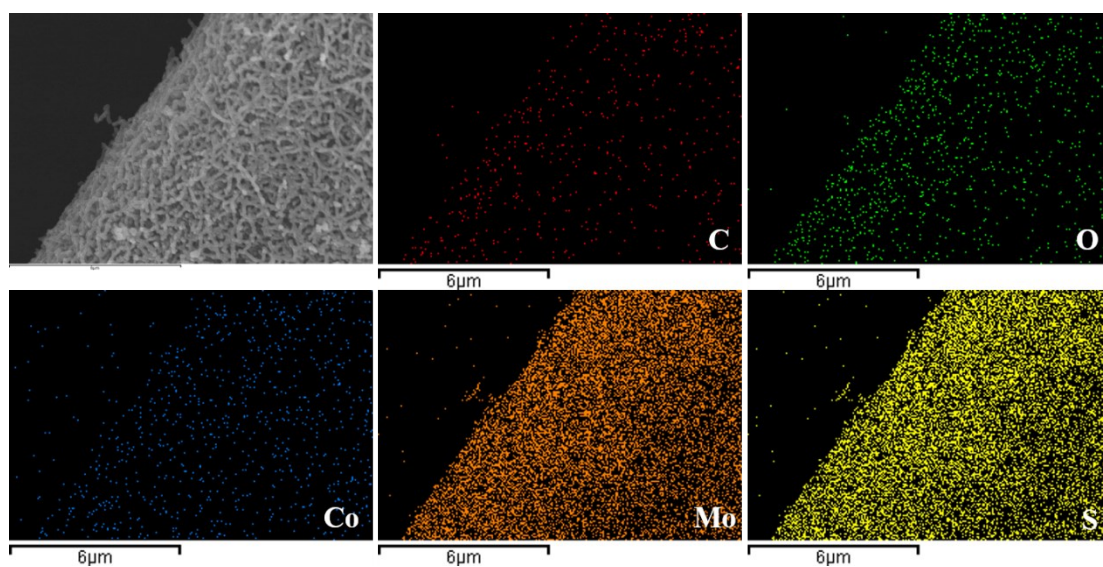

**Fig. S5** SEM image of 3D@1T-MoS<sub>2</sub> and corresponding elemental mapping images of C (red), O (green), Co (blue), Mo (orange) and S (yellow).

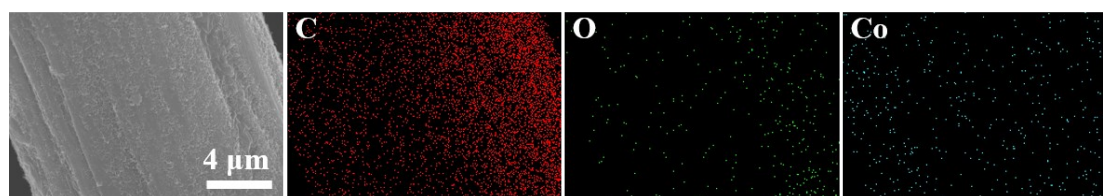

**Fig. S6** SEM image of CNT-CFC and corresponding elemental mapping images of C (red), O (green) and Co (blue).



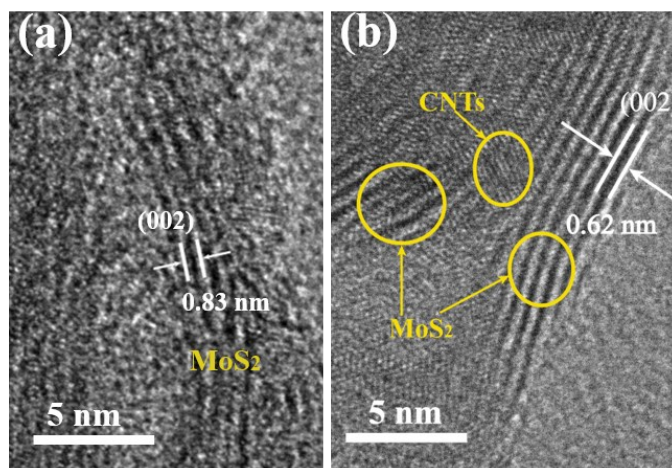

**Fig. S7** HR-TEM images of (a) 3D@1T-MoS<sub>2</sub> and (b) 3D@1T-MoS<sub>2</sub>-700.

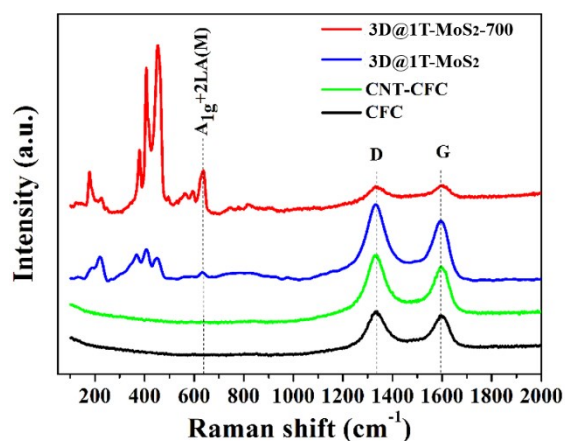

**Fig. S8** Raman spectra of CFC, CNT-CFC, 3D@1T-MoS<sub>2</sub> and 3D@1T-MoS<sub>2</sub>-700.

**Table S1** The relative fraction of 1T components of MoS<sub>2</sub> nanosheets with and without CNT as a composite, before and after 700 °C annealing in Ar atmosphere for 2 h, estimated by the deconvolution of Mo and S XPS peaks.

| materials                   | all%  |        | S%    |        | Mo%   |        |
|-----------------------------|-------|--------|-------|--------|-------|--------|
|                             | 1T    | 2H     | 1T    | 2H     | 1T    | 2H     |
| MoS <sub>2</sub> -CFC       | 51.01 | 48.99  | 53.21 | 46.79  | 48.68 | 51.32  |
| MoS <sub>2</sub> -CFC-700   | 0.00  | 100.00 | 0.00  | 100.00 | 0.00  | 100.00 |
| 3D@1T-MoS <sub>2</sub>      | 38.20 | 61.80  | 51.27 | 48.73  | 26.87 | 73.13  |
| 3D@1T-MoS <sub>2</sub> -600 | 76.51 | 23.49  | 68.35 | 31.65  | 84.67 | 15.33  |
| 3D@1T-MoS <sub>2</sub> -700 | 62.12 | 37.88  | 56.25 | 43.75  | 67.76 | 32.24  |

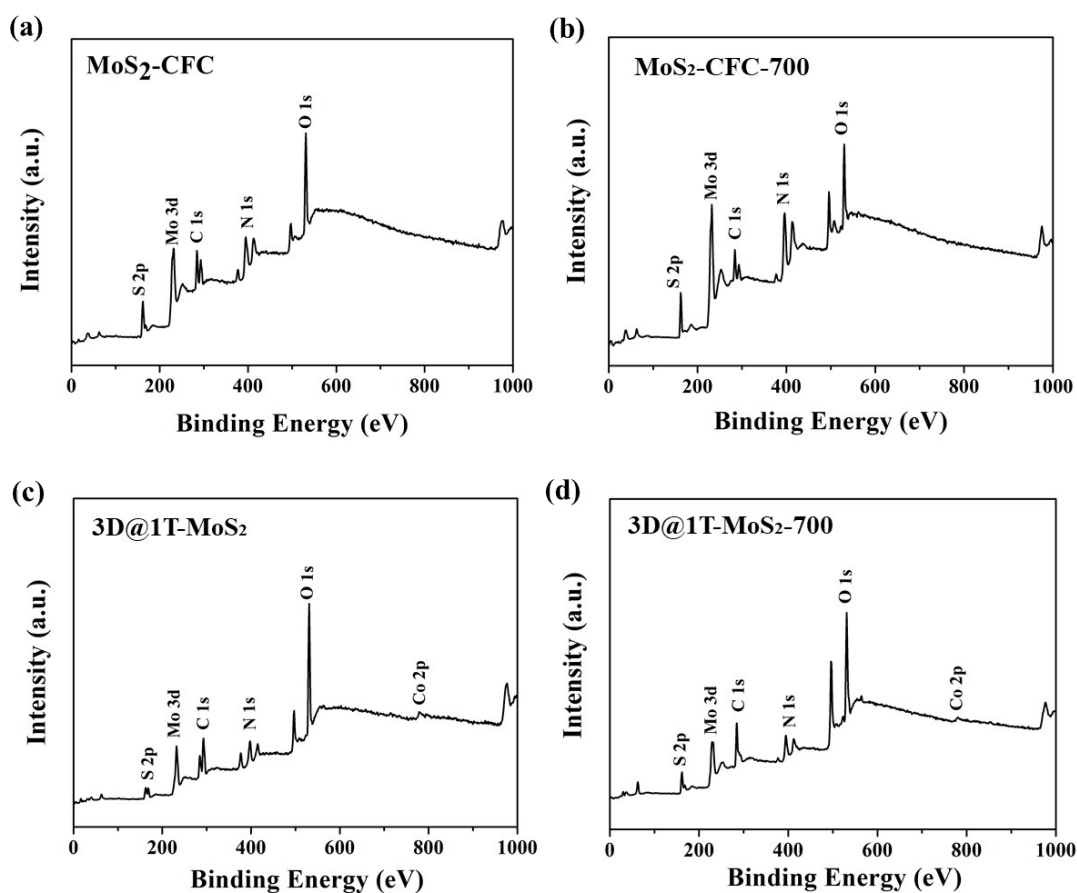

**Fig. S9** Survey XPS spectrum of (a) MoS<sub>2</sub>-CFC, (b) MoS<sub>2</sub>-CFC-700, (c) 3D@1T-MoS<sub>2</sub> and (d) 3D@1T-MoS<sub>2</sub>-700.

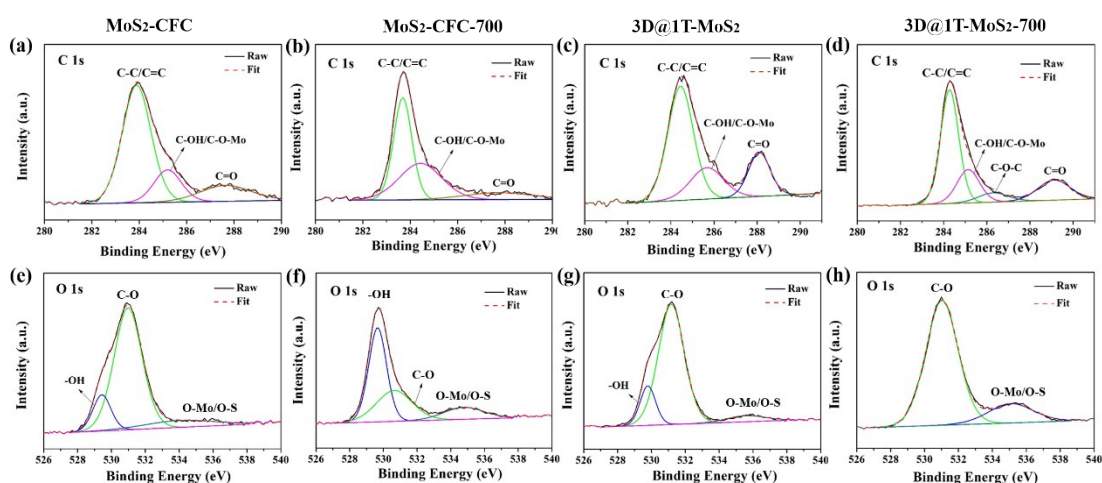

**Fig. S10** High-resolution XPS C 1s and O 1s spectra of the four selected samples. Each band was deconvoluted following the literature.

Rate constant based on the Arrhenius-type equation

$$k = Ae^{-E_a/RT} \longrightarrow \frac{k_{MoS_2}}{k_{MoS_2/CNT}} = \frac{Ae^{-0.712/0.025}}{Ae^{-0.900/0.025}} \approx 1.8 \times 10^3$$

$$E_a = \Delta E * 1.6e^{-19} * 6.02e^{23} \text{ J} \cdot \text{mol}^{-1}$$

$$R = 8.314 \text{ J} \cdot \text{mol}^{-1} \text{K}^{-1}$$

$$T = 298.15 \text{ K}$$

**Fig. S11** As based on the Arrhenius-type equation with the calculated activation energy difference, CNTs binding on MoS<sub>2</sub> slows down the phase transition about 1845 times.

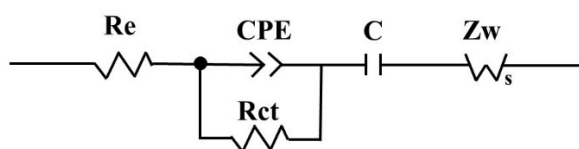

**Fig. S12** Equivalent circuit model to fit the Nyquist plots. Re is the resistance of electrolyte diffusion (the intercept of the semicircle at the imaginary axis); Rct is the charge-transfer resistance within the composites (the diameter of the semicircle); Zw is the Warburg-type resistance caused by ion diffusion in the electrode (the oblique inclined line in the low-frequency region).

**Table S2** Equivalent circuit parameters of CFC, CNT-CFC, MoS<sub>2</sub>-CFC, MoS<sub>2</sub>-CFC-700, 3D@1T-MoS<sub>2</sub> and 3D@1T-MoS<sub>2</sub>-700.

| <i>Electrode</i>                 | <i>Re(Ω)</i> | <i>Rct(Ω)</i> |
|----------------------------------|--------------|---------------|
| <i>CFC</i>                       | 5.002        | 299.8         |
| <i>CNT-CFC</i>                   | 6.783        | 23.98         |
| <i>MoS<sub>2</sub>-CFC</i>       | 10.14        | 8.032         |
| <i>MoS<sub>2</sub>-CFC-700</i>   | 5.242        | 24.00         |
| <i>3D@1T-MoS<sub>2</sub></i>     | 6.944        | 37.21         |
| <i>3D@1T-MoS<sub>2</sub>-700</i> | 2.261        | 15.52         |

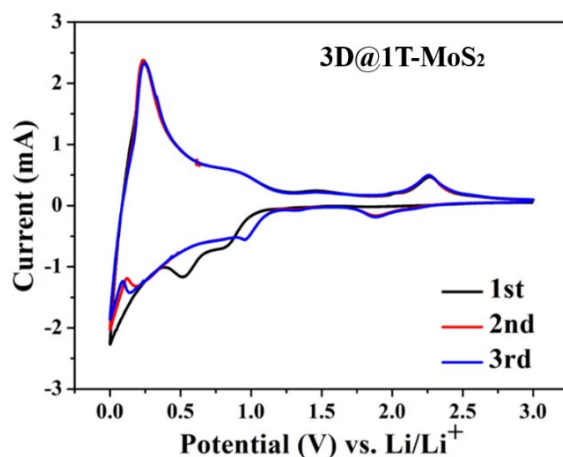

**Fig. S13** CV curves of 3D@1T-MoS<sub>2</sub> electrodes at a scan rate of 0.1 mV s<sup>-1</sup> between 0.01 and 3.0 V.

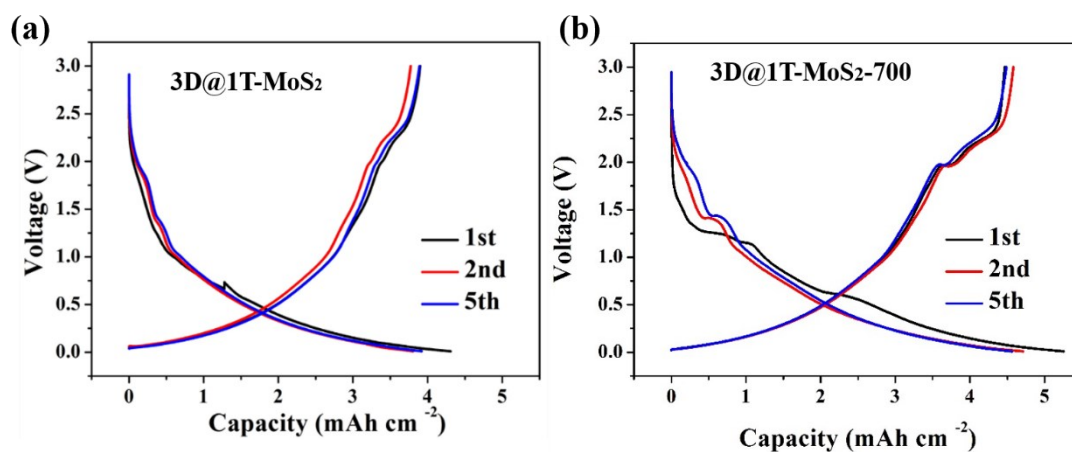

**Fig. S14** Discharge and charge voltage profiles of (a) 3D@1T-MoS<sub>2</sub> and (b) 3D@1T-MoS<sub>2</sub>-700 electrode at a current density of 0.1 mA cm<sup>-2</sup> for different cycles.

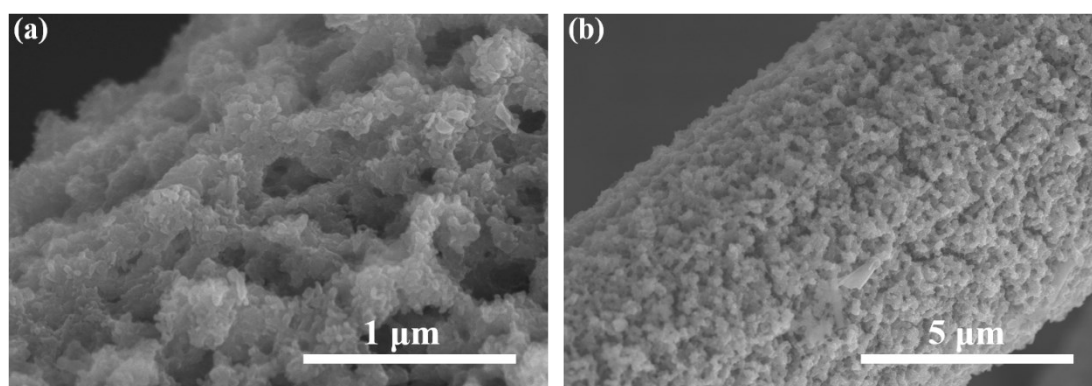

**Fig. S15** (a,b) SEM images of 3D@1T-MoS<sub>2</sub>-700 electrodes discharged to 0.01 V at current densities of 0.1 mA cm<sup>-2</sup> in the first cycle.



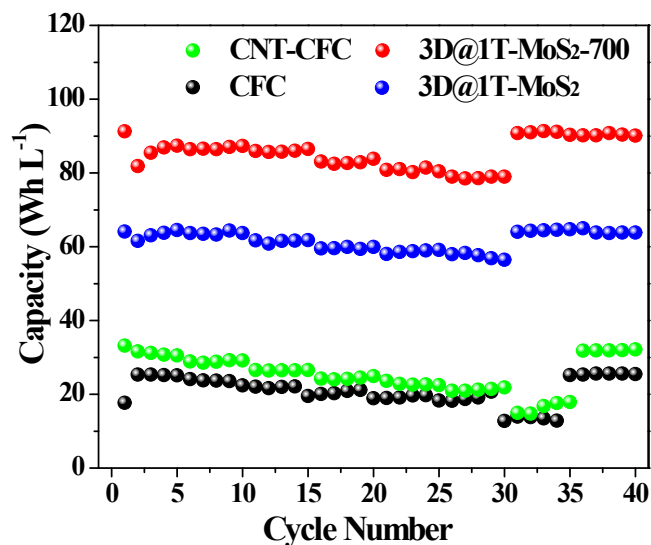

**Fig. S16** The volume energy density of the CFC, CNT-CFC, 3D@1T-MoS<sub>2</sub>, and 3D@1T-MoS<sub>2</sub>-700 electrodes at different current densities (The area of the electrode material is 1.13094 cm<sup>2</sup>. The thickness of the electrode material is 0.337±0.010 mm.).

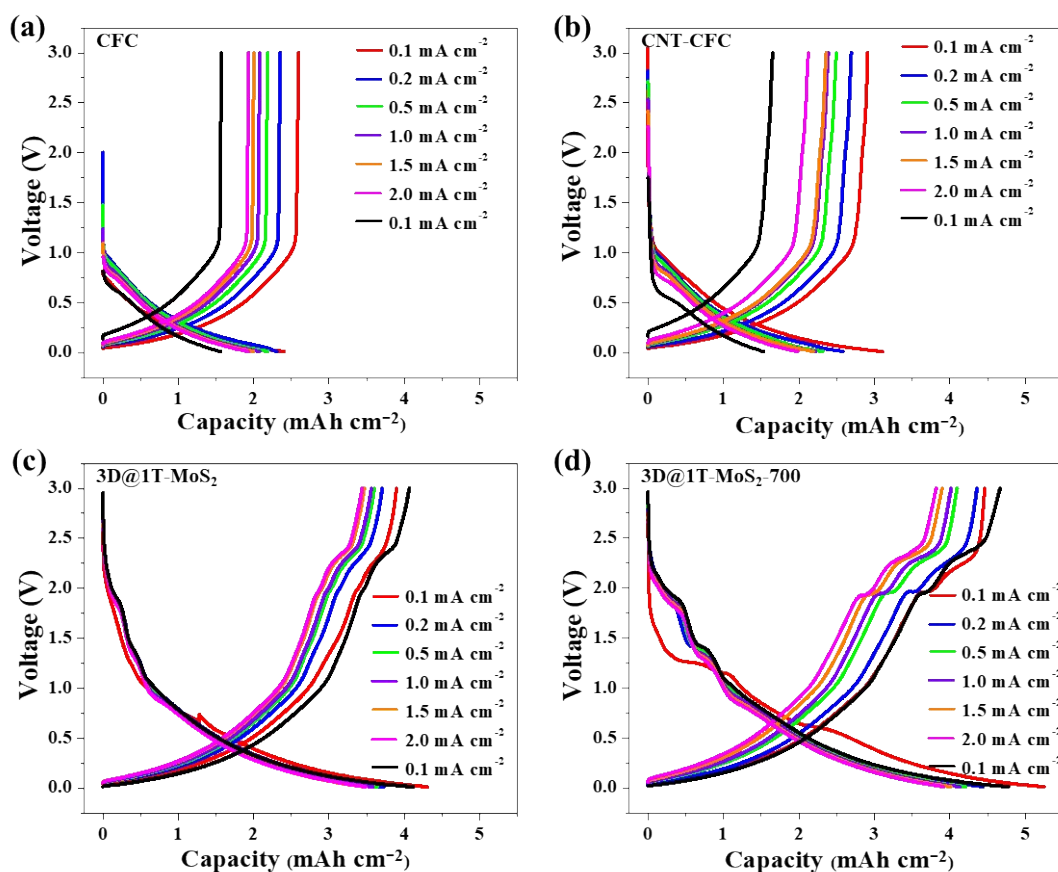

**Fig. S17** The galvanostatic discharge and charge voltage profiles of (a) CFC, (b) CNT-CFC, (c) 3D@1T-MoS<sub>2</sub> and (d) 3D@1T-MoS<sub>2</sub>-700 electrode at different current densities.

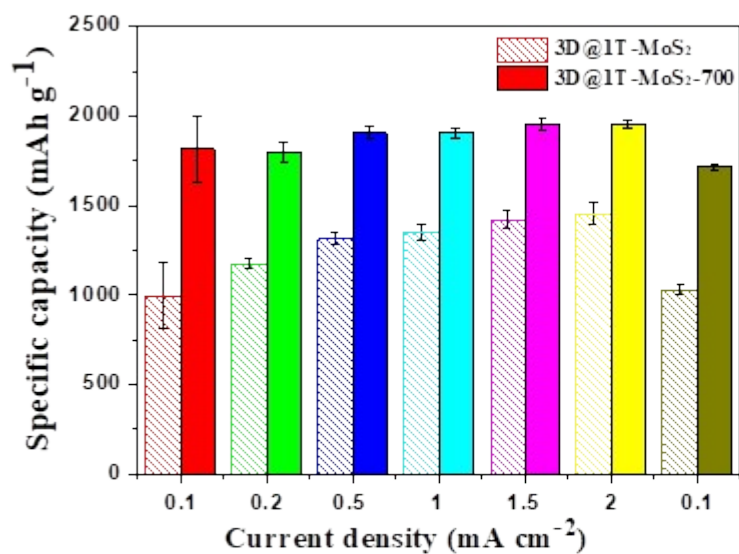

**Fig. S18** The calculated specific capacity of 3D@1T-MoS<sub>2</sub> and 3D@1T-MoS<sub>2</sub>-700 for LIBs.

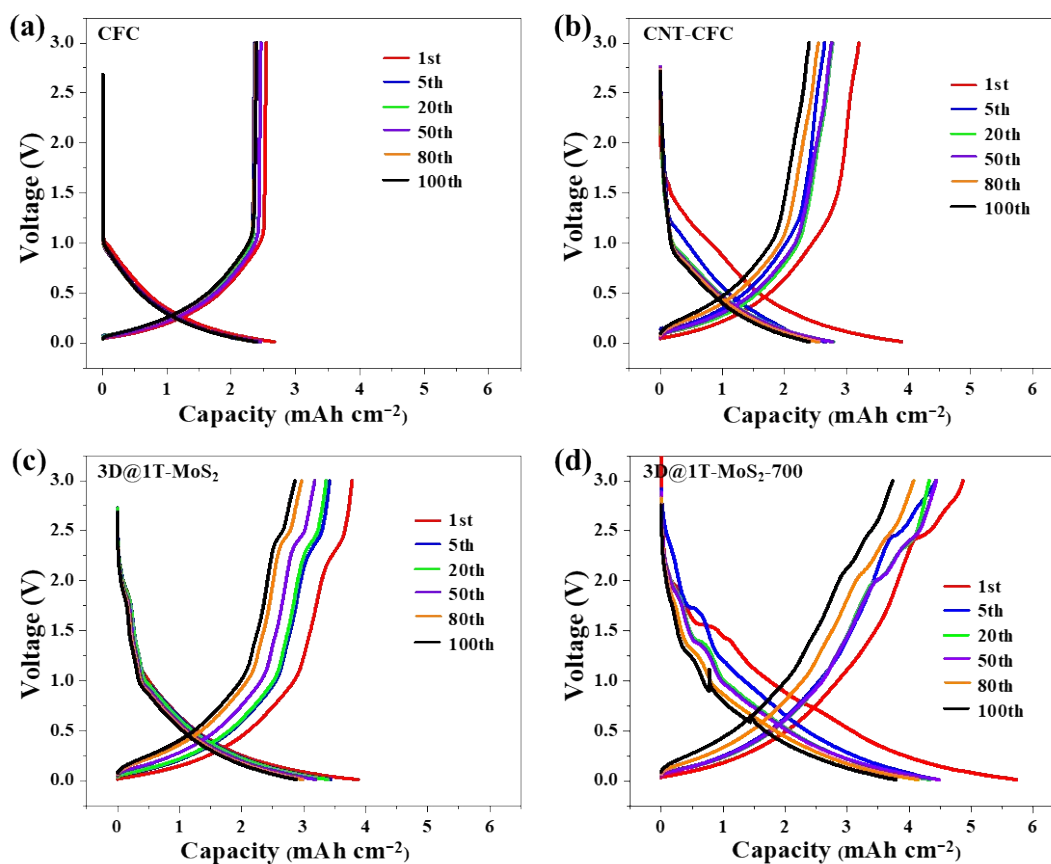

**Fig. S19** The galvanostatic discharge and charge voltage profiles of (a) CFC, (b) CNT-CFC, (c) 3D@1T-MoS<sub>2</sub> and (d) 3D@1T-MoS<sub>2</sub>-700 electrode at a current density of 0.5 mA cm<sup>-2</sup> for different cycles.

**Reference:**

- [1]. J. Clark Stewart, D. Segall Matthew, J. Pickard Chris, J. Hasnip Phil, I. J. Probert Matt, K. Refson and C. Payne Mike, *Z. Kristallogr.*, 2005, 220, 567.
- [2]. J. P. Perdew, K. Burke and M. Ernzerhof, *Phys. Rev. Lett.*, 1996, 77, 3865-3868.
- [3]. D. Vanderbilt, *Phys. Rev. B: Condens. Matter Mater. Phys.*, 1990, 41, 7892-7895.
- [4]. B. G. Pfrommer, M. Co<sup>^</sup>te ´, S. G. Louie and M. L. Cohen, *J. Comput. Phys.*, 1997, 131, 233-240.
- [5]. N. Govind, M. Petersen, G. Fitzgerald, D. King-Smith and J. Andzelm, *Comput. Mater. Sci.*, 2003, 28, 250-258.
- [6]. T. A. Halgren and W. N. Lipscomb, *Chem. Phys. Lett.*, 1977, 49, 225-232.
